# Supplementary material
Source: bioRxiv or medRxiv preprint supplement (https://www.biorxiv.org/highwire/filestream/73579/field_highwire_adjunct_files/0/240572-1.pdf)
Supplement: Supplementary file [file 240572-1.pdf]

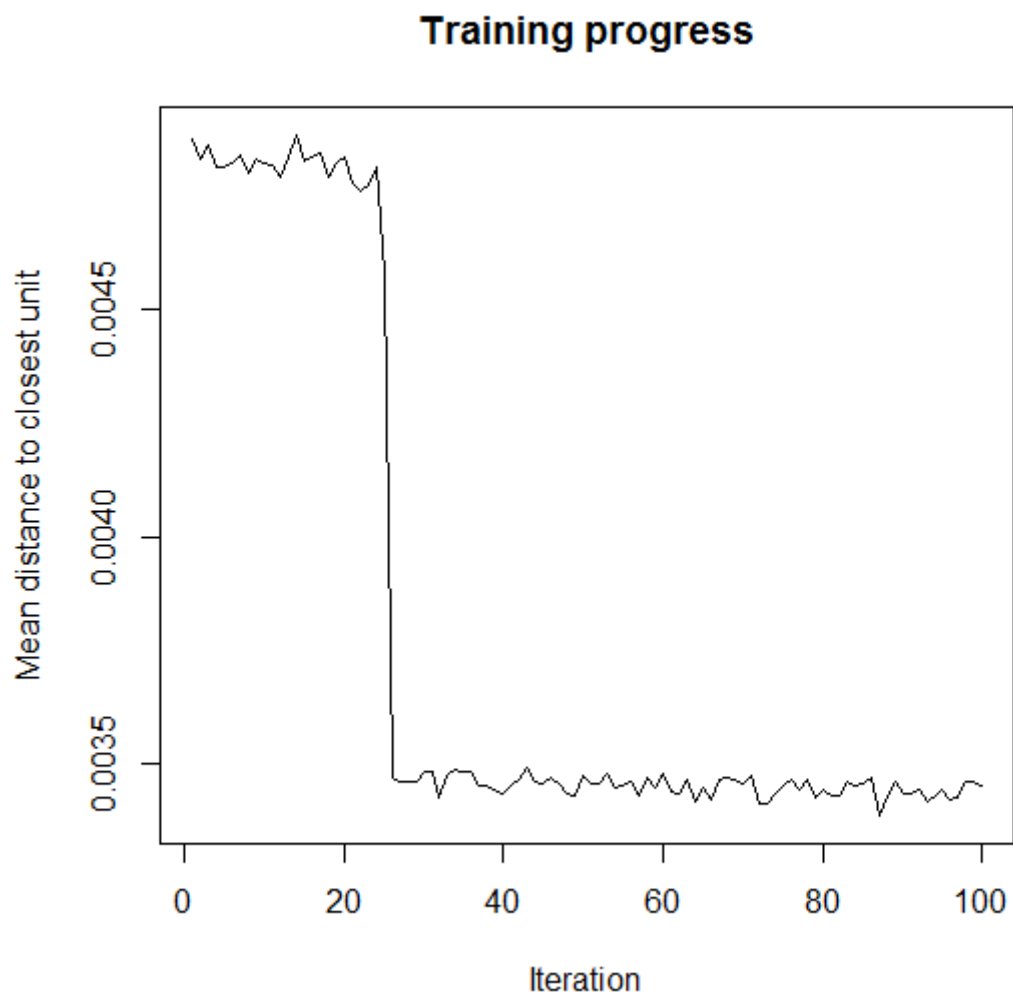

**Supplemental Figure S1.** Training progress of the average distances of genes using Self Organizing Maps (SOM), showing the effect of the neighborhood shrinking to reach the threshold for the minimum distance between genes used to construct SOM clusters.
